# Supplementary material for: A systematic review of non-productivity-related animal-based indicators of heat stress resilience in dairy cattle
Source: PLoS One. 2018 Nov 1;13(11):e0206520. doi: 10.1371/journal.pone.0206520 (PMC6211699; doi:10.1371/journal.pone.0206520)
Supplement: S2 Table — (XLSX) [file pone.0206520.s002.xlsx]

## Sheet: S2 Table
study id	author	year	country	region	Köppen classification (Kottec et al. 2006)	climate index	cow	breed	topic	system	yield	lactation stage	environmental comparison	duration hot period
1	Abeni	2007	Italy	Northern Italy	Cfb	THI	lactating cow	holstein	Harm: heat	outdoor access	medium	mid	HOT PERIOD	medium
2	Alfonzo	2016	Brasil	Piauí	Aw	THI	lactating cow	others	Harm: heat	pasture	low	u	HOT PERIOD	short
3	Allen	2013	USA	USA	Dfa	THI	lactating cow	unspecified	Harm: heat	undefined	medium	mid	HOT PERIOD	u
4	Anderson	2013	USA	Arizona	BSk	THI	lactating cow	holstein	Treatment: cooling system	outdoor access	medium	mid	HOT PERIOD	short
5	Arieli, Adin, and Bruckental	2004a	Israel	Israel	Csa	THI	lactating cow	unspecified	Treatment: diet	outdoor access	high	mid	HOT PERIOD	long
6	Arieli, Rubinstein, Moallem, Aharoni, Halachmi	2004b	Israel	Israel	Csa	Other variables	lactating cow	unspecified	Treatment: diet	undefined	high	annual	HOT PERIOD	long
7	Avendaño-Reyes	2012	Mexico	Baja California	BSk	THI	lactating cow	holstein	Treatment: cooling system	outdoor access	low	mid	HOT PERIOD	long
8	Avendaño-Reyes	2008	Mexico	Baja California	BSk	THI	others	holstein	Treatment: cooling system	outdoor access	low	annual	HOT PERIOD	long
9	Berman	2010	Israel	Israel	Csa	THI	lactating cow	holstein	Treatment: cooling system	indoor	high	annual	HOT PERIOD	short
10	Bewley	2008	USA	Indiana	Dfa	Other variables	lactating cow	holstein	Treatment: other	indoor	high	mid	COOL-WARM SEASON	short
11	Black	2016	Tennesse	Tennesse	Cfa	THI	others	holstein	Treatment: pasture	pasture	high	annual	u	u
12	Boga	2014	Turkey	Turkey	Csa	THI	lactating cow	holstein	Treatment: other Harm: heat	indoor	medium	mid	COOL-WARM SEASON	short
13	Bouraoui	2002	Tunissia	Tunissia	Csa	THI	lactating cow	holstein	Harm: heat	indoor	low	mid	COOL-WARM SEASON	long
14	Boyd	2012	USA	USA	Dfa	THI	lactating cow	holstein	Treatment: supplement	indoor	high	mid	HOT PERIOD	short
15	Broucek	2009	u	u	u	THI	others	holstein	Harm: heat	undefined	u	u	COOL-WARM SEASON	long
16	Burfeind	2012	Germany	Saxony-Anhalt	Cfb	THI	others	holstein	Harm: heat	indoor	u	u	COOL-WARM SEASON	medium
18	Calamari	2013	Italy	Northern Italy	Cfb	THI	lactating cow	holstein	Treatment: other, Treatment: diet	outdoor access	medium	mid	HOT PERIOD	long
19	Calegari	2012	Italy	Northern Italy	Cfb	THI	lactating cow	holstein	Treatment: other	outdoor access	medium	mid	HOT PERIOD	medium
20	Chan	1997	USA	Arizona	BSk	THI	lactating cow	holstein	Treatment: cooling system Treatment: diet	indoor	medium	mid	HOT PERIOD	long
21	Charlton	2011a	UK	West UK	Cfb	THI+rainfall	lactating cow	holstein	Treatment: pasture	pasture	medium	late	pasture but not necessary hot period	u
22	Charlton	2011b	UK	West UK	Cfb	THI+rainfall	lactating cow	holstein	Treatment: pasture	pasture	high	late	pasture but not necessary hot period	u
23	Charlton	2013	UK	West UK	Cfb	THI+rainfall	lactating cow	holstein	Treatment: pasture	pasture	high	late	pasture but not necessary hot period	u
24	Chen	2016	USA	California	Csb	Other variables	lactating cow	holstein	Treatment: cooling system	indoor	high	mid	HOT PERIOD	short
26	Chen	2013	USA	California	Csb	Other variables	lactating cow	holstein	Treatment: cooling system	outdoor access	low	mid	HOT PERIOD	short
25	Chen	2015	USA	California	Csb	Other variables	lactating cow	holstein	Treatment: cooling system	outdoor access	high	mid	HOT PERIOD	short
27	Cheng	2016	China	Beijing	Dwa	THI	lactating cow	holstein	Treatment: supplement	indoor	high	mid	HOT PERIOD	long
28	Cook	2007	USA	Wisconsin	Dfb	THI	lactating cow	holstein	Harm: heat	indoor	medium	mid	COOL-WARM SEASON	short
29	Correa-Calderon	2004	USA	Arizona	BSk	THI	lactating cow	others	Treatment: cooling system	outdoor access	u	u	HOT PERIOD	long
31	da Costa	2015	Brazil	Ceará	Aw	THI	lactating cow	others	Harm: heat	outdoor access	u	early	RAINY-DRY PERIOD	long
32	da Cruz	2016	Brazil	Minas Gerais	Aw	THI	lactating cow	others	Harm: heat	pasture	u	u	pasture but not necessary hot period	u
33	Dalcin	2016	Brazil	Minas Gerais	Aw	Other variables	lactating cow	others	Harm: heat	pasture	low	u	HOT PERIOD	short
34	Davison	2016	Australia	Queensland	Cfa	THI+rainfall	lactating cow	holstein	Treatment: cooling system Treatment: shade	pasture	u	u	HOT PERIOD	medium
35	de Palo	2006	Italy	Southern Italy	Csa	THI	lactating cow	holstein	Treatment: other	indoor	medium	mid	HOT PERIOD	u
36	de Vasconcelos	2014	Brazil	Minas Gerais	Aw	Other variables	lactating cow	holstein	Treatment: diet	indoor	medium	mid	HOT PERIOD	u
37	Dikmen	2009	USA	Florida	Cfa	Other variables	lactating cow	holstein	Harm: heat	undefined	medium	mid	u	u
38	Dikmen	2008	USA	Florida	Cfa	THI	lactating cow	holstein	Harm: heat	undefined	medium	mid	HOT PERIOD	short
39	Dikmen	2015	USA	Florida	Cfa	T	lactating cow	holstein	Harm: heat	undefined	high	mid	HOT PERIOD	u
40	do Amaral	2011	USA	Florida	Cfa	THI	others	holstein	Treatment: cooling system	indoor	medium	mid	HOT PERIOD	long
41	do Amaral	2009	USA	Florida	Cfa	THI	others	holstein	Treatment: cooling system	indoor	high	annual	HOT PERIOD	long
42	Du Preez	2000	South Africa	South Africa	Cwb	THI	lactating cow	holstein	Harm: heat	outdoor access	u	u	COOL-WARM SEASON	medium
43	Endres	2007	USA	Minnesota	Dfb	Other variables	lactating cow	others	Treatment: other	outdoor access	high	annual	HOT PERIOD	short
44	Eslamizad	2015	Germany	Mecklenburg-Vorpommern	Cfb	THI	others	holstein	Harm: heat	chamber	medium	early	TN-HS	short
45	Espinoza	2009	Mexico	Sonora	BWh	Other variables	lactating cow	others	Harm: heat	undefined	u	u	u	u
46	Falk	2012	Canada	British Columbia	Cfb	THI+rainfall	lactating cow	holstein	Treatment: pasture	pasture	medium	late	HOT PERIOD	u
47	Flamenbaum	1995	Israel	Israel	Csa	THI	lactating cow	holstein	Treatment: cooling system	outdoor access	high	mid	HOT PERIOD	u
48	Gallardo	2005	Argentina	Santa fe	Cfa	Other variables	lactating cow	holstein	Treatment: cooling system Treatment: diet	pasture	medium	mid	HOT PERIOD	long
50	Gebremedhin	2010	USA	Arizona	BSk	Other variables	lactating cow	holstein	Harm: heat	chamber	medium	early	HOT PERIOD	short
49	Gebremedhin	2012	USA	Mississippi	Cfa	Other variables	lactating cow	holstein	Treatment: cooling system	indoor	high	late	HOT PERIOD	short
51	Havlin	2015	USA	California	Csb	THI	lactating cow	holstein	Treatment: supplement	outdoor access	high	early	HOT PERIOD	short
52	Her	1988	Israel	Israel	Csa	THI	others	holstein	Treatment: cooling system	outdoor access	u	u	HOT PERIOD	long
53	Hernández-Rivera	2011	Mexico	Baja California	BSk	THI	lactating cow	holstein	Treatment: cooling system	outdoor access	low	mid	HOT PERIOD	long
54	Honig	2012	Israel	Israel	Csa	THI	lactating cow	holstein	Treatment: cooling system Treatment: shade	outdoor access	medium	mid	HOT PERIOD	long
55	Igono	1987	USA	Missouri	Cfa	Other variables	lactating cow	holstein	Treatment: cooling system	undefined	u	u	HOT PERIOD	long
56	Jara	2016	Chile	Araucania	Csb	Other variables	lactating cow	holstein	Harm: heat	undefined	u	u	HOT PERIOD	u
57	Jonsson	1997	Australia	Queensland	Cfa	THI	others	holstein	Harm: heat	outdoor access	medium	early	COOL-WARM SEASON	u
58	Kabuga	1991	Ghana	Ashanti	Aw	Other variables	others	holstein	Treatment: diet	indoor	low	annual	u	long
59	Kanjanapruthipong	2015	Thailand	Nakorn Pathom	Aw	THI	others	others	Treatment: diet	indoor	low	early	HOT PERIOD	long
60	Karimi	2015	Iran	Lavark	BWk	THI	others	holstein	Treatment: cooling system	indoor	high	mid	HOT PERIOD	long
61	Kendall	2007	New Zealand	Waikato	Cfb	Other variables	lactating cow	holstein	Treatment: shade	pasture	low	mid	HOT PERIOD	u
69	Ketelaar-de Lauwere	1999	Netherlands	Netherlands	Cfb	Other variables	lactating cow	holstein	Treatment: pasture	pasture	u	late	u	medium
62	Khelil-Arfa	2014	France	Rennes	Cfb	Other variables	others	holstein	Treatment: supplement	chamber	high	mid	TN-HS	medium
63	Khongdee	2006	Thailand	Sakon Nakhon	Aw	THI	lactating cow	others	Treatment: cooling system	indoor	low	mid	HOT PERIOD	long
64	Khongdee	2010	Thailand	Sakon Nakhon	Aw	Other variables	lactating cow	others	Treatment: other	indoor	low	mid	HOT PERIOD	long
65	Kim	2010	South Korea	South Korea	Dwa	THI	lactating cow	holstein	Harm: heat	chamber	medium	late	TN-HS	medium
66	Koubková	2002	Czech Republik	Czech Republik	Dfb	T	lactating cow	holstein	Treatment: cooling system	chamber	medium	mid	TN-HS	medium
68	Laporta	2017	USA	Florida	Cfa	THI	others	holstein	Treatment: cooling system	indoor	u	u	u	u
70	Lee	2007	USA	Hawi(Hawai)	Am	Other variables	lactating cow	holstein	Harm: heat	pasture	u	u	HOT PERIOD	short
72	Legrand	2011	USA	California	Csb	Other variables	others	holstein	Treatment: cooling system	indoor	u	u	HOT PERIOD	short
71	Legrand	2009	Canada	British Columbia	Cfb	Other variables	lactating cow	holstein	Treatment: pasture	pasture	high	late	HOT PERIOD	u
73	Leyva-Corona	2016	Mexico	Sonora	BWh	THI	lactating cow	holstein	Treatment: cooling system	outdoor access	medium	mid	HOT PERIOD	long
74	Li	2012	China	beijing	Dwa	THI	lactating cow	holstein	Treatment: cooling system	outdoor access	u	u	HOT PERIOD	long
75	Lima	2013	Brazil	Pernambuco	Aw	Other variables	lactating cow	others	Harm: heat	outdoor access	u	u	HOT PERIOD	long
76	Lin	1998	USA	Alabama	Cfa	Other variables	others	holstein	Treatment: cooling system	indoor	low	mid	HOT PERIOD	long
77	Lohölter	2013	Germany	Lower Saxony	Cfb	THI	lactating cow	holstein	Treatment: supplement	indoor	medium	mid	HOT PERIOD	long
78	Lough	1990	USA	Florida	Cfa	Other variables	lactating cow	holstein	Treatment: diet	chamber	low	mid	TN-HS	medium
79	Magdub	1982	USA	Missouri	Cfa	THI	lactating cow	holstein	Harm: heat Treatment: diet	chamber	low	mid	TN-HS	medium
80	Mallonée	1985	USA	Florida	Cfa	Other variables	lactating cow	others	Treatment: shade Treatment: supplement	outdoor access	u	u	HOT PERIOD	long
81	Marcillac-Embertson	2009	USA	California	Csb	Other variables	others	holstein	Treatment: cooling system Treatment: shade	undefined	u	u	HOT PERIOD	long
82	Matarazzo	2005	Brazil	Sao Paulo	Cfb	THI	lactating cow	unspecified	Treatment: cooling system	indoor	u	early	HOT PERIOD	long
83	McDowell	1969	USA	Arizona	BSk	THI	lactating cow	holstein	Harm: heat	chamber	u	mid	TN-HS	medium
84	Miron	2008	Israel	Israel	Csa	THI	lactating cow	holstein	Treatment: diet	undefined	high	mid	HOT PERIOD	long
85	Moallem	2010	Israel	Israel	Csa	THI	lactating cow	holstein	Treatment: supplement	outdoor access	high	mid	HOT PERIOD	long
86	Moody	1967	USA	Maryland	Cfa	THI	lactating cow	holstein	Treatment: diet	chamber	low	mid	TN-HS	medium
87	Moore	2005	USA	Arizona	BSk	Other variables	lactating cow	others	Treatment: supplement	indoor	medium	mid	HOT PERIOD	long
88	Neuwirth	1979	u	u	u	THI	others	holstein	Harm: heat	chamber	u	u	TN-HS	short
89	Ominski	2002	Canada	Manitoba	Dfb	THI	lactating cow	holstein	Treatment: other	chamber	high	mid	TN-HS	short
90	Ominski	2003	Canada	Manitoba	Dfb	THI	lactating cow	holstein	Treatment: supplement	chamber	high	mid	TN-HS	short
92	Ortiz	2015b	USA	Arizona	BSk	THI	lactating cow	holstein	Treatment: cooling system	chamber	high	late	TN-HS	short
93	Ortiz	2011	Saudi Arabia	Saudi Arabia	BWh	THI	lactating cow	holstein	Treatment: cooling system	outdoor access	high	early	HOT PERIOD	long
94	Ortiz	2010	Saudi Arabia	Saudi Arabia	BWh	THI	lactating cow	holstein	Treatment: cooling system	outdoor access	high	mid	HOT PERIOD	short
91	Ortiz	2015a	Saudi Arabia	Saudi Arabia	BWh	THI	lactating cow	holstein	Treatment: cooling system	outdoor access	high	early	HOT PERIOD	short
95	Palacio	2015	Canada	Ontario	Dfb	THI	lactating cow	holstein	Treatment: shade	pasture	high	annual	HOT PERIOD	short
96	Perano	2015	USA	New York	Dfb	THI	lactating cow	holstein	Treatment: cooling system	chamber	high	mid	HOT PERIOD	long
97	Pereyra	2010	Argentina	Buenos Aires	Cfa	THI	lactating cow	others	Treatment: other	pasture	low	late	HOT PERIOD	short
98	Sailo	2016	India	Haryana	BSh	THI	others	others	Harm: heat	undefined	u	u	COOL-WARM SEASON	long
99	Salvati	2015	Brazil	Minas Gerais	Aw	THI	lactating cow	holstein	Treatment: supplement	indoor	medium	mid	u	u
100	Schneider	1984	USA	Florida	Cfa	Other variables	lactating cow	holstein	Treatment: shade Treatment: supplement	outdoor access	u	u	HOT PERIOD	long
101	Schütz	2014	New Zealand	Waikato	Cfb	Other variables	others	unspecified	Treatment: shade	pasture	low	annual	u	u
103	Shehab-El-Deen	2010b	Egypt	Al-Sharkia	BWh	THI	lactating cow	holstein	Harm: heat	indoor	high	annual	COOL-WARM SEASON	long
102	Shehab-El-Deen	2010a	Egypt	Al-Sharkia	BWh	THI	lactating cow	holstein	Harm: heat	indoor	low	mid	HOT PERIOD	long
104	Shwartz	2009	USA	Arizona	BSk	THI	lactating cow	holstein	Treatment: supplement	chamber	medium	mid	TN-HS	medium
105	Smith	2016	USA	Kansas	Dfa	THI	lactating cow	holstein	Treatment: cooling system	indoor	high	mid	HOT PERIOD	medium
106	Soriani	2013	Italy	Northern Italy	Cfb	THI	lactating cow	holstein	Harm: heat	indoor	medium	mid	HOT PERIOD	long
107	Spiers	2004	USA	Missouri	Cfa	THI	lactating cow	holstein	Harm: heat	chamber	medium	early	TN-HS	short
108	Stone	2017	Kentuky	Kentuky	Cfa	THI	lactating cow	others	Harm: heat	outdoor access	high	annual	u	u
109	Su	2013	China	Beijing	Dwa	THI	others	holstein	Harm: heat	indoor	high	annual	COOL-WARM SEASON	long
110	Tao	2011	USA	Florida	Cfa	THI	others	unspecified	Harm: heat	indoor	high	annual	u	u
111	Tao	2012	USA	Florida	Cfa	THI	others	holstein	Harm: heat	outdoor access	high	annual	u	u
112	Tapki	2006	Turkey	Turkey	Csa	THI	lactating cow	holstein	Harm: heat	indoor	high	annual	HOT PERIOD	long
113	Thompson	2014	USA	Florida	Cfa	THI	others	holstein	Harm: heat	undefined	high	annual	u	u
114	Titto	2013	Brazil	Sao Paulo	Cfb	Other variables	lactating cow	holstein	Treatment: cooling system	outdoor access	medium	annual	COOL-WARM SEASON	short
115	Tresoldi	2016	USA	California	Csb	Other variables	lactating cow	holstein	Harm: heat	outdoor access	high	mid	COOL-WARM SEASON	short
116	Tripon	2014	Romania	Romania	Dfb	THI	others	holstein	Harm: heat	indoor	u	u	COOL-WARM SEASON	short
117	Tsai	1967	Philipines	Philipines	Af	Other variables	lactating cow	others	Treatment: diet	undefined	u	u	HOT PERIOD	long
118	Tucker	2008	New Zealand	Waikato	Cfb	Other variables	lactating cow	holstein	Treatment: shade	pasture	low	mid	HOT PERIOD	medium
120	Valtorta	2004	Argentina	Santa Fe	Cfa	THI	lactating cow	holstein	Treatment: cooling system	pasture	medium	mid	HOT PERIOD	u
119	Valtorta	1997	Argentina	Santa Fe	Cfa	Other variables	others	unspecified	Treatment: shade	pasture	u	u	HOT PERIOD	long
121	Vizzotto	2015	Brazil	Santa Catarina	Cfb	THI	lactating cow	others	Treatment: shade	pasture	low	mid	HOT PERIOD	short
122	Wang	2010	China	Beijing	Dwa	THI	lactating cow	holstein	Treatment: diet	indoor	medium	mid	HOT PERIOD	long
125	West	2003	USA	Georgia	Cfa	THI	lactating cow	others	Harm: heat	outdoor access	low	early	COOL-WARM SEASON	long
124	West	1999	USA	Georgia	Cfa	THI	lactating cow	others	Treatment: diet	outdoor access	medium	early	COOL-WARM SEASON	long
123	West	1991	USA	Georgia	Cfa	THI	lactating cow	others	Treatment: supplement	outdoor access	low	mid	COOL-WARM SEASON	long
126	Wheelock	2010	USA	Arizona	BSk	THI	lactating cow	holstein	Harm: heat	chamber	medium	mid	TN-HS	short
127	Wise	1988	USA	Arizona	BSk	THI	lactating cow	holstein	Harm: heat	outdoor access	u	u	TN-HS	long
128	Wolferson	1988	Israel	Israel	Csa	THI	others	holstein	Treatment: cooling system	outdoor access	u	u	HOT PERIOD	long
132	Yan	2014	China	Shangai	Cfa	THI	lactating cow	holstein	Treatment: cooling system	indoor	medium	mid	HOT PERIOD	medium
129	Younas	1993	USA	Mississippi	Cfa	THI	lactating cow	holstein	Treatment: cooling system	indoor	u	u	HOT PERIOD	long
130	Zähner	2004	Switzerland	Switzerland	Dfb	THI	others	others	Harm: heat	outdoor access	medium	annual	pasture but not necessary hot period	u
131	Zimbelman	2010	USA	Arizona	BSk	THI	lactating cow	holstein	Treatment: supplement	chamber	medium	mid	TN-HS	short
